# Supplementary material
Source: PubMed Central journal article supplement (PMC2659288)
Supplement: en.2008-0868_1.pdf [file en.2008-0868_1.pdf]

| <b>Gene</b> | <b>Direction</b> | <b>Sequence</b>                               |
|-------------|------------------|-----------------------------------------------|
| <i>Mest</i> | Forward          | TAATACGACTCACTATAGGGAGCCTGAGACGCATCGTCCTCT    |
|             | Reverse          | TGGATTTAGGTGACACTATAGAAGATGACCAGGTTGCCGTCAT   |
| <i>Peg3</i> | External Forward | GGTTGACAGTCGTGAATATGCA                        |
|             | External Reverse | ATCGAATGGTGACCCAGA                            |
|             | Internal Forward | TAATACGACTCACTATAGGGAGCACTCCGTCAGCGAATTTGA    |
|             | Internal Reverse | TGGATTTAGGTGACACTATAGAACAACAGTGAAATTTCTCCTTGG |
| <i>Igf2</i> | Forward          | TAATACGACTCACTATAGGGAGTGGCCTGGTATCCAAAACATC   |
|             | Reverse          | TGGATTTAGGTGACACTATAGAAGGCCACACTAGGCATAGGAGG  |
