# Supplementary material
Source: PubMed Central journal article supplement (PMC2659288)
Supplement: en.2008-0868_2.pdf [file en.2008-0868_2.pdf]

| <i>Probe Set</i> | <i>Gene Symbol</i> | <i>Gene Title</i>                                                                                      | <i>Heart</i> | <i>Kidney</i> | <i>Lung</i> |
|------------------|--------------------|--------------------------------------------------------------------------------------------------------|--------------|---------------|-------------|
| 1435761_at       | Stfa3              | stefin A3                                                                                              | 43.7         | 11.4          | 19.4        |
| 1423813_at       | Kif22              | kinesin family member 22                                                                               | 11.8         | 10.0          | 7.1         |
| 1448194_a_at     | H19                | H19 fetal liver mRNA                                                                                   | 11.7         | 46.7          | 48.6        |
| 1448254_at       | Ptn                | pleiotrophin                                                                                           | 11.7         | 16.4          | 4.5         |
| 1449154_at       | Col11a1            | procollagen, type XI, alpha 1                                                                          | 11.6         | 29.5          | 9.0         |
| 1417939_at       | Rad51ap1           | RAD51 associated protein 1                                                                             | 11.6         | 8.0           | 6.0         |
| 1447363_s_at     | Bub1b              | budding uninhibited by benzimidazoles 1 homolog, beta (S. cerevisiae)                                  | 10.9         | 11.8          | 5.7         |
| 1455280_at       | Frem1              | Fras1 related extracellular matrix protein 1                                                           | 10.8         | 9.8           | 6.2         |
| 1454830_at       | Fbn2               | fibrillin 2                                                                                            | 9.4          | 9.2           | 9.9         |
| 1420854_at       | Eln                | elastin                                                                                                | 8.9          | 8.6           | 4.1         |
| 1436517_at       | H1fx               | H1 histone family, member X                                                                            | 8.6          | 5.6           | 3.6         |
| 1416342_at       | Tnc                | tenascin C                                                                                             | 8.2          | 3.8           | 17.7        |
| 1423294_at       | Mest               | mesoderm specific transcript                                                                           | 8.1          | 13.9          | 10.9        |
| 1452912_at       | 2600005O03Rik      | RIKEN cDNA 2600005O03 gene                                                                             | 8.0          | 4.1           | 7.7         |
| 1453957_a_at     | Igf2bp3            | insulin-like growth factor 2, binding protein 3                                                        | 7.8          | 5.8           | 21.2        |
| 1428492_at       | Glpr2              | GLI pathogenesis-related 2                                                                             | 7.1          | 17.9          | 3.8         |
| 1448152_at       | Igf2               | insulin-like growth factor 2                                                                           | 7.1          | 4.7           | 4.4         |
| 1428481_s_at     | Cdca8              | cell division cycle associated 8                                                                       | 6.5          | 4.0           | 3.7         |
| 1455038_at       | LOC632764          | Transcribed locus, weakly similar to XP_484135.1<br>PREDICTED: hypothetical protein XP_484135 [Mus mus | 6.2          | 14.9          | 7.0         |
| 1419157_at       | Sox4 /// LOC672274 | SRY-box containing gene 4                                                                              | 6.0          | 8.1           | 3.3         |
| 1451105_at       | Vash2              | RIKEN cDNA B130052G07 gene                                                                             | 5.8          | 3.9           | 5.0         |
| 1441997_at       | Zfp184             | zinc finger protein 184 (Kruppel-like)                                                                 | 5.8          | 5.2           | 3.8         |
| 1437226_x_at     | Marcks1            | MARCKS-like 1                                                                                          | 5.7          | 7.7           | 6.3         |
| 1428713_s_at     | 4833427B12Rik      | RIKEN cDNA 4833427B12 gene                                                                             | 5.5          | 3.0           | 4.1         |
| 1452954_at       | Ube2c              | ubiquitin-conjugating enzyme E2C                                                                       | 5.5          | 3.7           | 5.2         |
| 1453418_at       | Col24a1            | procollagen, type XXIV, alpha 1                                                                        | 5.3          | 4.8           | 7.6         |
| 1428069_at       | Cdca7              | cell division cycle associated 7                                                                       | 5.0          | 20.6          | 4.0         |
| 1452595_at       | Adamts4            | a disintegrin-like and metallopeptidase (reprolysin type)<br>with thrombospondin type 1 motif, 4       | 4.9          | 7.1           | 5.5         |
| 1448941_at       | B4galt2            | UDP-Gal:betaGlcNAc beta 1,4- galactosyltransferase, polypeptide 2                                      | 4.7          | 4.3           | 4.0         |
| 1434129_s_at     | Lhfp12             | lipoma HMGIC fusion partner-like 2                                                                     | 4.7          | 5.4           | 5.9         |
| 1422643_at       | Moxd1              | monooxygenase, DBH-like 1                                                                              | 4.5          | 13.3          | 7.6         |
| 1424292_at       | Depdc1a            | DEP domain containing 1a                                                                               | 4.5          | 3.6           | 6.0         |
| 1449939_s_at     | Dlk1               | delta-like 1 homolog (Drosophila)                                                                      | 4.4          | 6.5           | 14.7        |
| 1419943_s_at     | Ccnb1              | cyclin B1                                                                                              | 4.2          | 5.0           | 7.3         |
| 1430811_a_at     | Nuf2               | cell division cycle associated 1                                                                       | 4.2          | 3.2           | 4.8         |
| 1423506_a_at     | Nnat               | neuronatin                                                                                             | 4.1          | 7.7           | 3.4         |
| 1418919_at       | Sgol1              | shugoshin-like 1 (S. pombe)                                                                            | 4.1          | 4.9           | 4.4         |
| 1416572_at       | Mmp14              | matrix metallopeptidase 14 (membrane-inserted)                                                         | 4.0          | 8.6           | 3.5         |
| 1436789_at       | Ccnj1              | gene model 877, (NCBI)                                                                                 | 4.0          | 7.4           | 4.9         |
| 1437152_at       | Rkhd3              | ring finger and KH domain containing 3                                                                 | 4.0          | 4.1           | 4.0         |
| 1450625_at       | Col5a2             | procollagen, type V, alpha 2                                                                           | 3.9          | 4.5           | 3.1         |

|              |               |                                                                                                   |     |      |      |
|--------------|---------------|---------------------------------------------------------------------------------------------------|-----|------|------|
| 1459211_at   | Gli2          | GLI-Kruppel family member GLI2                                                                    | 3.9 | 15.1 | 3.2  |
| 1438009_at   | MGC73635      | Histone 1, H2ae, mRNA                                                                             | 3.9 | 8.8  | 4.9  |
| 1439754_at   | Sox12         | SRY-box containing gene 12                                                                        | 3.8 | 3.9  | 9.6  |
| 1419464_at   | 2810046M22Rik | RIKEN cDNA 2810046M22 gene                                                                        | 3.5 | 4.6  | 3.5  |
| 1425099_a_at | Arntl         | aryl hydrocarbon receptor nuclear translocator-like                                               | 3.4 | 4.8  | 3.7  |
| 1429295_s_at | Trip13        | thyroid hormone receptor interactor 13                                                            | 3.4 | 3.5  | 3.8  |
| 1416698_a_at | Cks1b         | CDC28 protein kinase 1b                                                                           | 3.4 | 6.0  | 3.6  |
| 1431834_a_at | Emilin1       | elastin microfibril interfacer 1                                                                  | 3.4 | 7.9  | 4.5  |
| 1450757_at   | Cdh11         | cadherin 11                                                                                       | 3.4 | 13.7 | 3.8  |
| 1448593_at   | Wisp1         | WNT1 inducible signaling pathway protein 1                                                        | 3.3 | 15.2 | 5.2  |
| 1433543_at   | Anln          | anillin, actin binding protein (scraps homolog, Drosophila)                                       | 3.2 | 3.3  | 3.2  |
| 1424278_a_at | Birc5         | baculoviral IAP repeat-containing 5                                                               | 3.2 | 3.2  | 3.0  |
| 1433924_at   | Peg3          | Peg3 mRNA for zinc finger protein                                                                 | 3.1 | 6.3  | 5.4  |
| 1448650_a_at | Pole          | polymerase (DNA directed), epsilon                                                                | 3.1 | 10.1 | 22.2 |
| 1447862_x_at | Thbs2         | thrombospondin 2                                                                                  | 3.1 | 17.2 | 7.1  |
| 1460292_a_at | Smarca1       | SWI/SNF related, matrix associated, actin dependent regulator of chromatin, subfamily a, member 1 | 3.1 | 7.5  | 4.7  |
| 1419152_at   | 2810417H13Rik | RIKEN cDNA 2810417H13 gene                                                                        | 3.0 | 4.8  | 4.4  |
