# Supplementary material
Source: PubMed Central journal article supplement (PMC2659288)
Supplement: en.2008-0868_3.pdf [file en.2008-0868_3.pdf]

| <i>Probe Set</i> | <i>Gene Symbol</i> | <i>Gene title</i>                                                                                                                | <i>Heart</i> | <i>Kidney</i> | <i>Lung</i> |
|------------------|--------------------|----------------------------------------------------------------------------------------------------------------------------------|--------------|---------------|-------------|
| 1456986_at       | Zbtb16             | PREDICTED: zinc finger and BTB domain containing 16 [Mus musculus], mRNA sequence                                                | 34.9         | 30.1          | 25.9        |
| 1423436_at       | Gsta3              | glutathione S-transferase, alpha 3                                                                                               | 33.7         | 4.0           | 7.4         |
| 1444487_at       | Lrat               | Lecithin-retinol acyltransferase (phosphatidylcholine-retinol-O-acyltransferase) (Lrat), mRNA                                    | 25.8         | 3.3           | 23.3        |
| 1451006_at       | Xdh                | xanthine dehydrogenase                                                                                                           | 17.3         | 4.8           | 6.9         |
| 1448181_at       | Klf15              | Kruppel-like factor 15                                                                                                           | 8.9          | 5.9           | 33.7        |
| 1460033_at       | C030002C11Rik      | RIKEN cDNA C030002C11 gene                                                                                                       | 8.6          | 3.6           | 4.5         |
| 1441799_at       | 6030422H21Rik      | FK506 binding protein 5, mRNA (cDNA clone MGC:18417 IMAGE:4237766)                                                               | 7.2          | 6.5           | 6.7         |
| 1429900_at       | 5330406M23Rik      | RIKEN cDNA 5330406M23 gene                                                                                                       | 6.9          | 6.1           | 4.6         |
| 1452431_s_at     | H2-Aa /// H2-Ea    | histocompatibility 2, class II antigen A, alpha                                                                                  | 6.5          | 4.1           | 4.5         |
| 1420349_at       | Ptgfr              | prostaglandin F receptor                                                                                                         | 6.0          | 4.1           | 4.9         |
| 1424737_at       | Thrsp              | thyroid hormone responsive SPOT14 homolog (Rattus)                                                                               | 5.9          | 3.3           | 7.1         |
| 1424211_at       | Slc25a33           | RIKEN cDNA 5730438N18 gene                                                                                                       | 5.8          | 3.4           | 3.6         |
| 1456341_a_at     | Klf9               | Kruppel-like factor 9                                                                                                            | 5.5          | 3.7           | 6.5         |
| 1438211_s_at     | Dbp                | D site albumin promoter binding protein<br>homocysteine-inducible, endoplasmic reticulum stress-inducible, ubiquitin-like domain | 4.3          | 10.1          | 9.3         |
| 1448185_at       | Herpud1            | member 1                                                                                                                         | 3.9          | 7.4           | 3.8         |
